# Supplementary material for: Rational design of dimensionally matched 2D/2D COF based photocatalysts for highly efficient noble-metal-free solar energy catalysis
Source: Royal Society of Chemistry journal article supplement (doi:10.1039/d4tc02938k), 2024-01-01
Supplement: d4tc02938k1.pdf [file d4tc02938k1.pdf]

## Electronic Supplementary Information

# Rational Design of Dimensional Matched 2D/2D COFs Based Photocatalysts for Highly Efficient Noble-Metal-Free Solar Energy Catalysis

Haijun Hu<sup>a</sup>, Xiaodong Sun<sup>\*a</sup>, Hui Li<sup>b</sup>, Hongwei Huang<sup>c</sup>, Tianyi Ma<sup>\*b</sup>

<sup>a</sup> *Institute of Clean Energy Chemistry, Key Laboratory for Green Synthesis and Preparative Chemistry of Advanced Materials, College of Chemistry, Liaoning University, Shenyang 110036, People's Republic of China*

<sup>b</sup> *School of Science, RMIT University, Melbourne, VIC 3000, Australia*

<sup>c</sup> *Beijing Key Laboratory of Materials Utilization of Nonmetallic Minerals and Solid Wastes, National Laboratory of Mineral Materials, School of Materials Science and Technology, China University of Geosciences, Beijing, 100083, China*

\*Corresponding author.

E-mail address: [sunxiaodong@lnu.edu.cn](mailto:sunxiaodong@lnu.edu.cn); [tianyi.ma@rmit.edu.au](mailto:tianyi.ma@rmit.edu.au).

**Keywords:** Covalent organic frameworks; Co-catalysts; Photocatalysis; Hydrogen evolution

## 1. Characterization

SEM images were acquired using a Hitachi SU-8010 equipped with an EDS analyzer. TEM and HRTEM images were obtained on a JEM-2100 operating at 10 kV. XRD patterns were collected using a D8 Advance (Bruker) X-ray diffraction system with a Cu K $\alpha$  radiation ( $\lambda = 0.15406$  nm). XPS spectra were recorded by the Thermo Scientific ESCALAB 250Xi spectrometer equipped with a monochromatic Al K $\alpha$  X-ray source (1486.6 eV). The UV-vis spectra were obtained by the Ultraviolet-visible diffuse reflectance spectroscopy (UV-vis DRS) with BaSO<sub>4</sub> as the reflectance standard (Shimadzu UV-2550). Thermogravimetric analysis (TGA, METTLER TOLEDO TGA/SDTA851) was performed to analyze the structure of as-prepared samples with a heating rate of 10 °C·min<sup>-1</sup> under N<sub>2</sub> atmosphere. The surface area and pore size of prepared samples was investigated by nitrogen adsorption-desorption measurements (QuantaAutosorb IQ). Fluorescence measurements were carried out with the RF-5301PC (Shimadzu, Japan) fluorescence spectrophotometer (excitation wavelength: 350 nm). The Fourier transformed infrared spectroscopy (FT-IR) was performed on a Nicolet Nexus 670 FT-IR spectrophotometer at a resolution of 4 cm<sup>-1</sup>.

## 2. Photocatalytic H<sub>2</sub> production properties

Photocatalytic H<sub>2</sub> production experiments were carried out via a full glass automatic on-line trace gas analysis system (Labsolar-6A, Beijing Perfectlight Technology Co., Ltd.). The light source is the 300 W Xenon lamp (wavelength: 320-780 nm, PLS-SXE300/300UV, light intensity: 100 mW·cm<sup>-2</sup>, Beijing Perfectlight Technology Co., Ltd.). Hydrogen was detected and quantitative analyzed by a GC7900 gas

chromatography (Shanghai Tianmei Scientific Instrument Co.) with nitrogen as the carrier gas, and the detection interval was 30 min. The catalyst was placed in a custom-made quartz glass reactor, and the reaction temperature was controlled at 5 °C by condensing water. 10 mg of catalyst was added into 100 mL of deionized water containing 100 mg of L-Ascorbic acid as hole scavenger. Then, the chloroplatinic acid solution ( $\text{H}_2\text{PtCl}_6 \cdot 6\text{H}_2\text{O}$ ) was added. After that, the suspension was stirred in a 200 mL customized quartz reactor. Before each photocatalytic reaction, the system was vacuum-treated several times to remove the dissolved air. The whole reaction system was illuminated by the Xe light irradiation with a UV cut-off filter ( $\lambda \geq 420$  nm). In addition, the apparent quantum efficiency (AQE) was measured utilizing a xenon lamp equipped with bandpass filters. Photocatalytic experiments were conducted with 10 mg of catalysts, where the wavelengths of the filters used are 400, 420, 500, 550 and 600 nm, respectively. The specific value of AQE was calculated on the basis of the following formula:

$$AQE(H_2)\% = \frac{2 \times N(H_2)}{N(\text{photons})} \times 100\%$$

where  $N(H_2)$  refers to the number of  $H_2$  molecules produced, and  $N(\text{photons})$  means the number of photons reaching the surface of the reaction suspension.<sup>1</sup>

### **3. Photo-electrochemical characterization**

The electrochemical measurement was carried out by the electrochemical workstation with the model of CHI 760. The test was carried out in a three-electrode system, in which the Pt sheet was used as the counter electrode, the Ag/AgCl electrode was used as the reference electrode, and the prepared powder sample was used as the working

electrode. In addition, 0.2 M Na<sub>2</sub>SO<sub>4</sub> was utilized as the electrolyte solution, and a xenon lamp equipped with a filter ( $\lambda \geq 420$  nm) was utilized as the visible light source. 10 mg of catalyst sample and 20  $\mu$ l of Nafion solution were dissolved in 1 mL of anhydrous ethanol solution, sonicated for 30 min to make them evenly mixed, and then scraped onto FTO glass (1 cm  $\times$  1 cm) to manufacture the working electrode. In addition, the Mott-Schottky tests were conducted to acquire the flat-band potential of the material. In the absence of light, the stable open-circuit voltage of this sample was initially measured, and subsequently tested at varying frequencies (500 and 1000 Hz).

On the basis of Mott-Schottky equation:

$$\frac{1}{C^2} = \frac{2}{N_D e \epsilon_0 \epsilon} \left( E - E_{fb} - \frac{kT}{e} \right)$$

where C refers to the capacitance of the space charge region, N<sub>D</sub> stands for the electron carrier density, e is the elemental charge,  $\epsilon_0$  is the permittivity of a vacuum,  $\epsilon$  represents the relative permittivity of the semiconductor, E is the applied potential, E<sub>fb</sub> is the flat band potential, T is the temperature, and k is the Boltzmann constant. The type of semiconductor material is determined by the positive or negative value of the slope of the linear part of the Mott-Schottky curve: Typically, n-type semiconductors possess a positive slope, while p-type semiconductors have a negative slope.<sup>2</sup>

In addition, the mean lifespan of the photogenerated carriers determined through the open-circuit voltage decay technique is obtained from equation blow:

$$\tau_n = \frac{K_B T}{e} \left( \frac{dOCVD}{dt} \right)^{-1}$$

where  $K_B$  stands for the Boltzmann constant, and the value is  $1.38 \times 10^{-23} \text{ J}\cdot\text{K}^{-1}$ ,  $T$  refers to temperature (298 K),  $e$  means the electric charge ( $1.602 \times 10^{-19} \text{ C}$ ), and  $d\text{OCVD}/dt$  denotes the derivative of the OCP transient decay.<sup>3</sup>

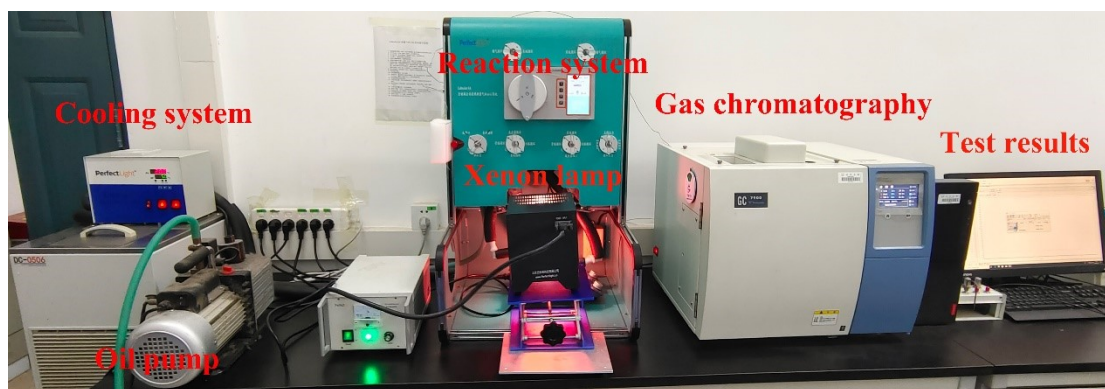

**Fig. S1.** Photocatalytic experimental equipment. The labsolar-6a all-glass automatic on-line trace gas analysis system, produced by Beijing Perfectlight Technology Co., Ltd., was utilized for conducting the photocatalytic experiments. The illumination was provided by the 300 W Xenon lamp manufactured by Beijing Perfectlight Technology Co., Ltd. Hydrogen was detected and quantitative analyzed by a GC7900 gas chromatography made by Shanghai Tianmei Scientific Instrument Co.

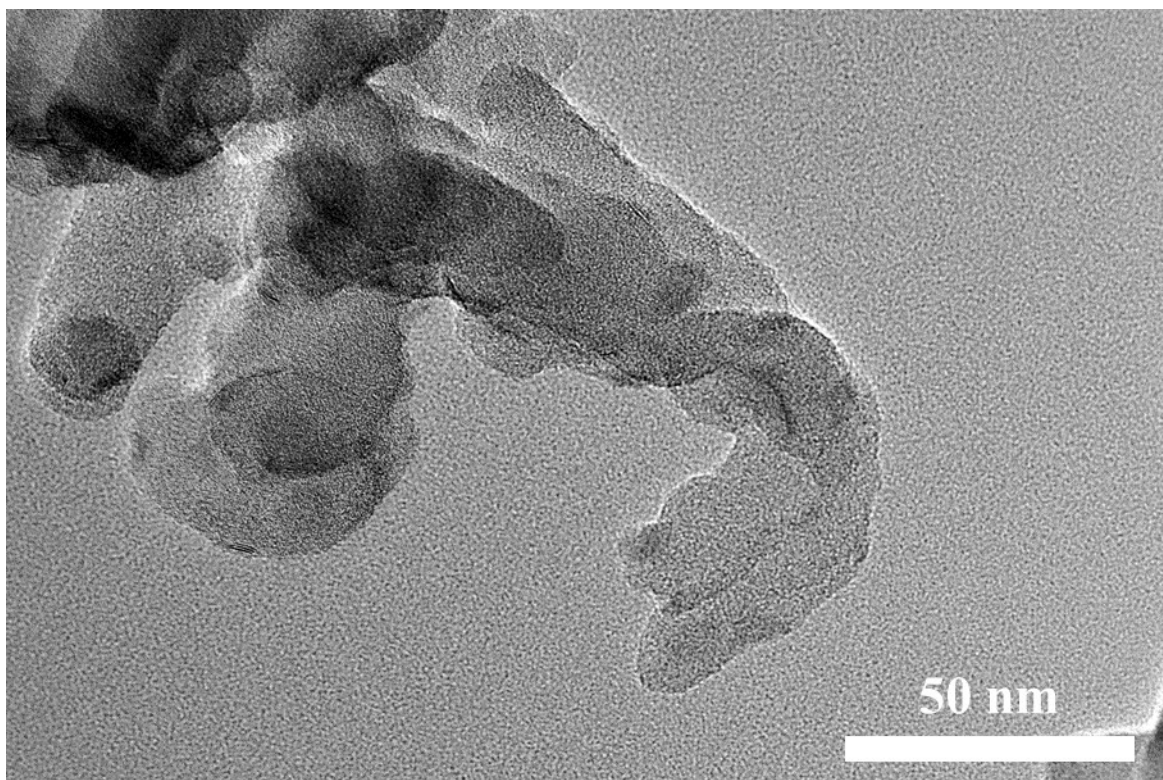

**Fig. S2.** The TEM image of TP1C. As shown in Fig. S2, TP1C displayed flower-like morphology, which corresponded well with the SEM images.

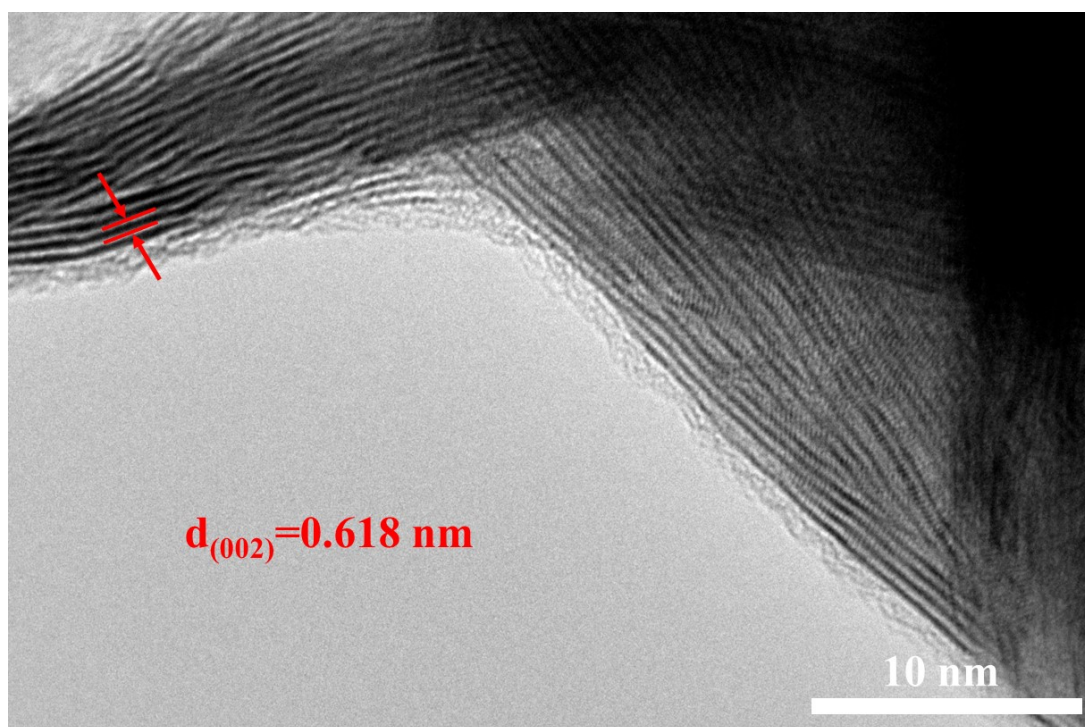

**Fig. S3.** The HR-TEM images of WS<sub>2</sub>. As portrayed in Fig. S3, the lattice spacing of WS<sub>2</sub> was about 0.618 nm, which referred to the (002) crystal plane of WS<sub>2</sub>.



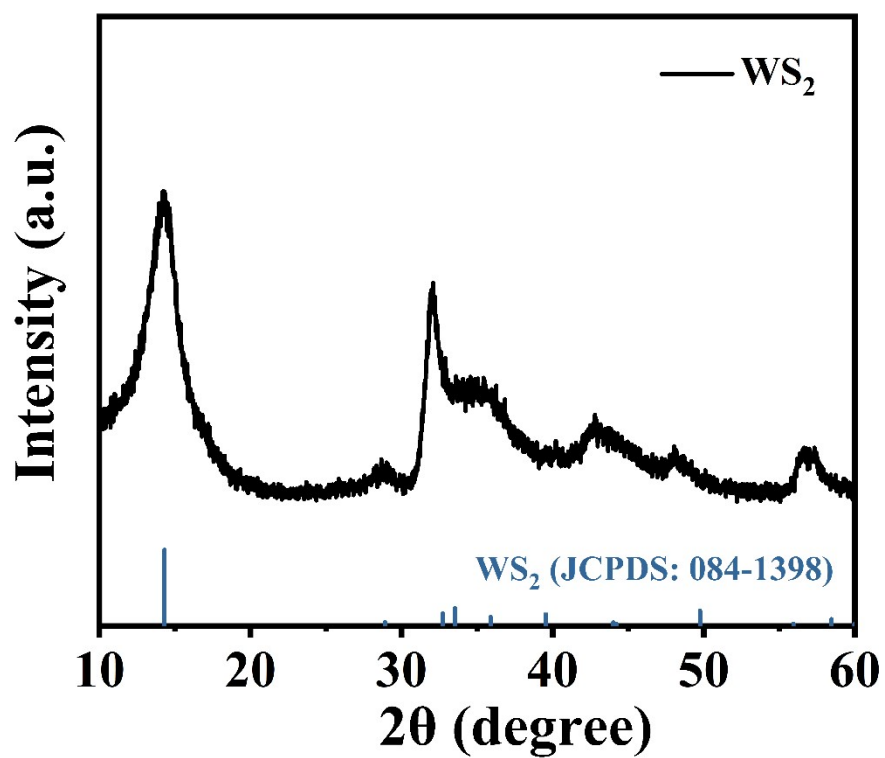

**Fig. S4.** The XRD spectra of WS<sub>2</sub>. It can be seen from Fig.S4 that the peak positions of WS<sub>2</sub> were consistent with JPCDS card (084-1398) for pure hexagonal WS<sub>2</sub>, which proved the successful preparation of WS<sub>2</sub> nanosheets.

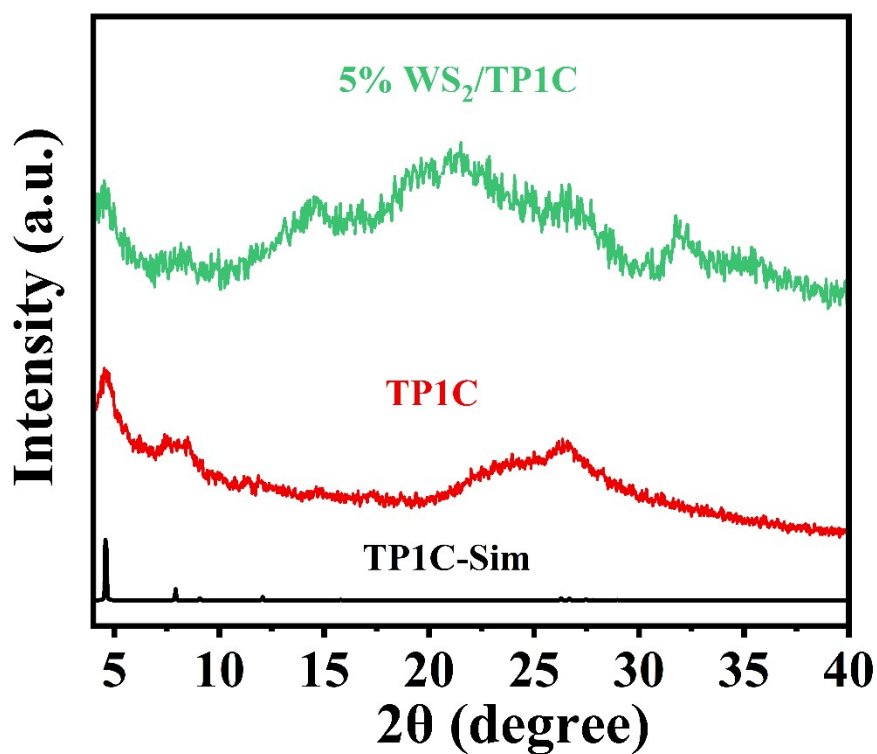

**Fig. S5.** The XRD spectra of TP1C and 5% WS<sub>2</sub>/TP1C. As illustrated in Fig. S5, the diffraction peak positions of the Powder X-ray diffraction (PXRD) tests of TP1C closely matched those of the simulated standard card, with no additional impurity peaks detected, in which the two obvious peaks at 4.6° and 26.6° corresponded to the (100) and (001) planes of TP1C, indicating that TP1C was successfully prepared with high degree of crystallinity. In the hybrid sample, the PXRD diffraction peaks of both TP1C and WS<sub>2</sub> can be observed, and the smaller peak intensity of WS<sub>2</sub> may be due to its low content.

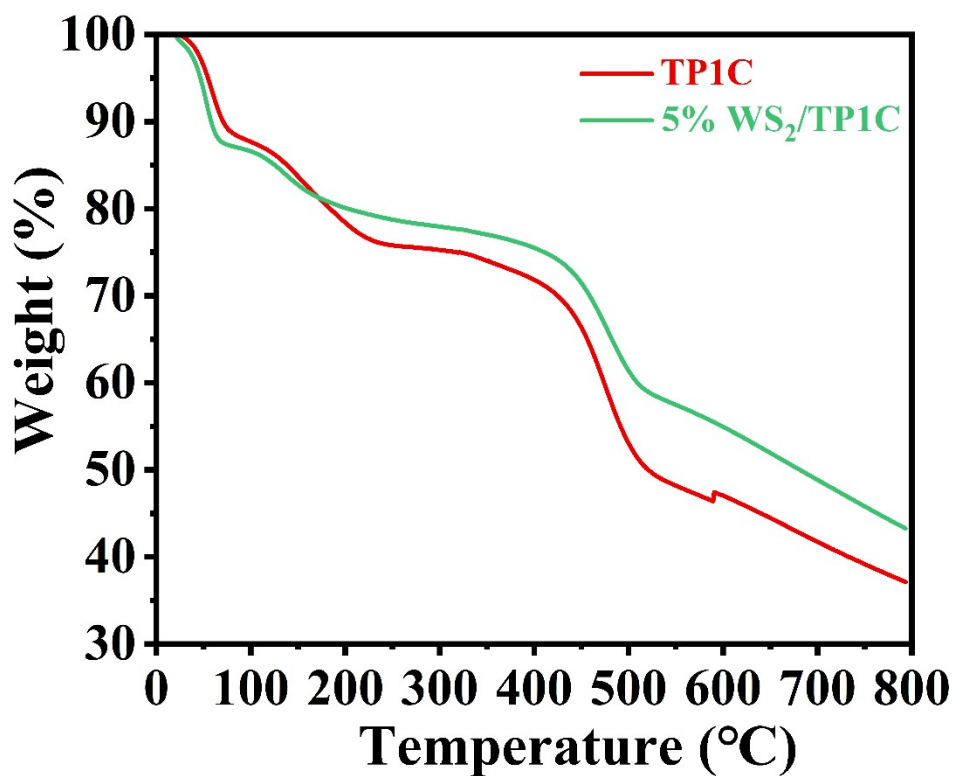

**Fig. S6.** The TG patterns of prepared samples. As shown in Fig. S6, the weight of prepared samples decreased as temperature increased. The weight loss before 200 °C primarily resulted from the evaporation of water or solvent on the surface or within the pores of COFs. The decomposition temperatures of bare COFs and WS<sub>2</sub>/TP1C hybrid material were about 450 and 430 °C, respectively, indicating their excellent thermal stability.

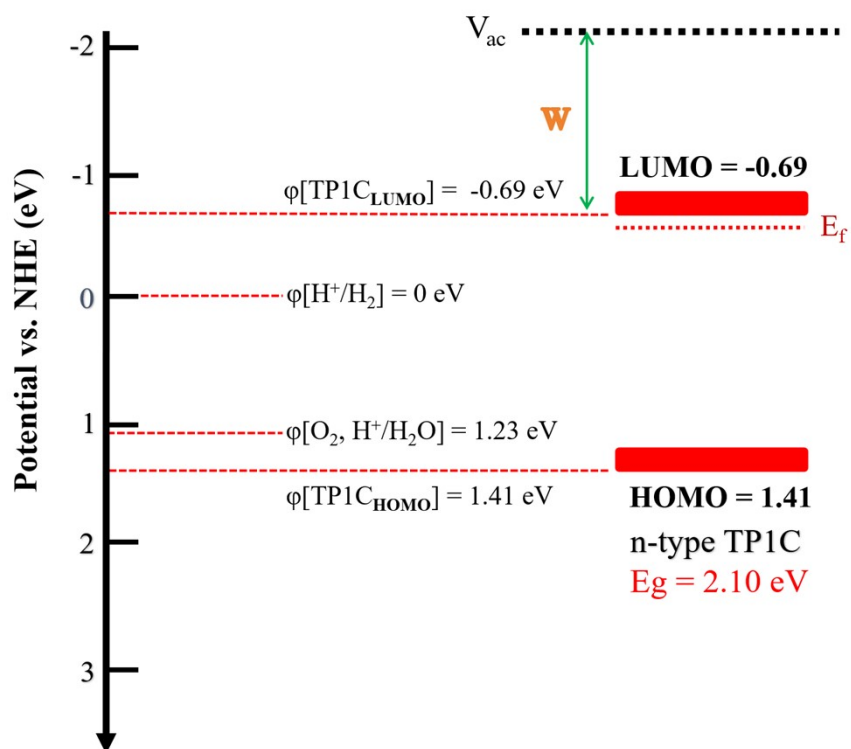

**Fig. S7.** Schematic energy-band image for TP1C ( $V_{\text{ac}}$ , HOMO, LUMO,  $E_{\text{f}}$  and  $W$  refer to vacuum level, Highest Occupied Molecular Orbit, Lowest Unoccupied Molecular Orbit, Fermi level, Work function, respectively).

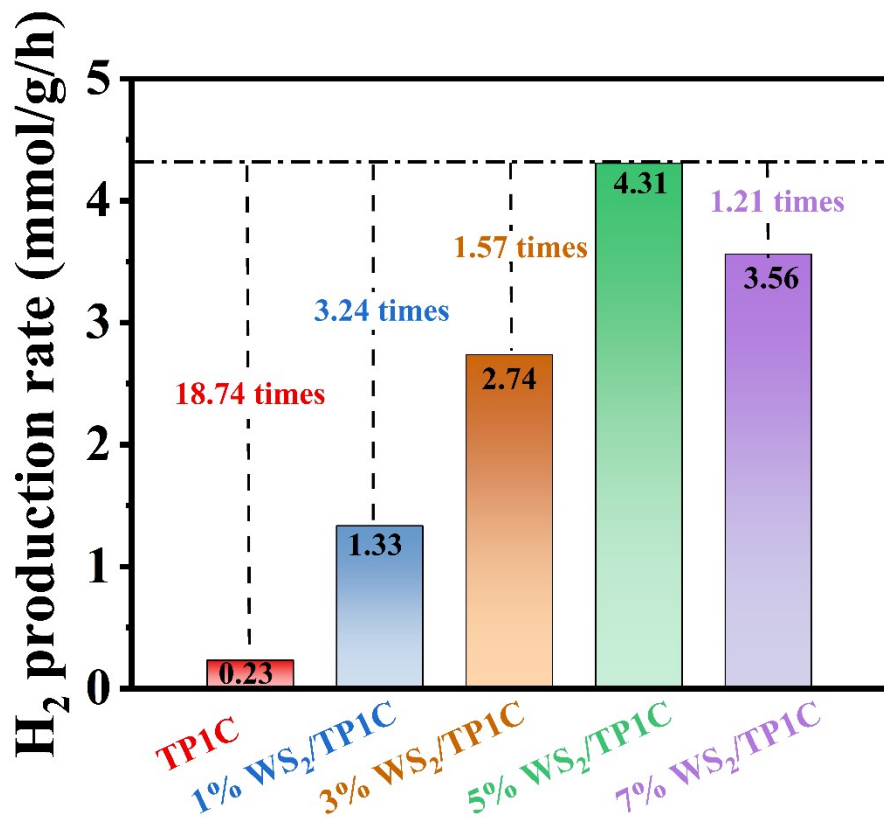

**Fig. S8.** Photocatalytic hydrogen evolution rate of synthesized products. As shown in Fig.S8, since WS<sub>2</sub> nanosheets promoted photogenerated charge transfer, 5% WS<sub>2</sub>/TP1C exhibited optimal photocatalytic activity, which was about 18.74 times higher over that of pure COFs.

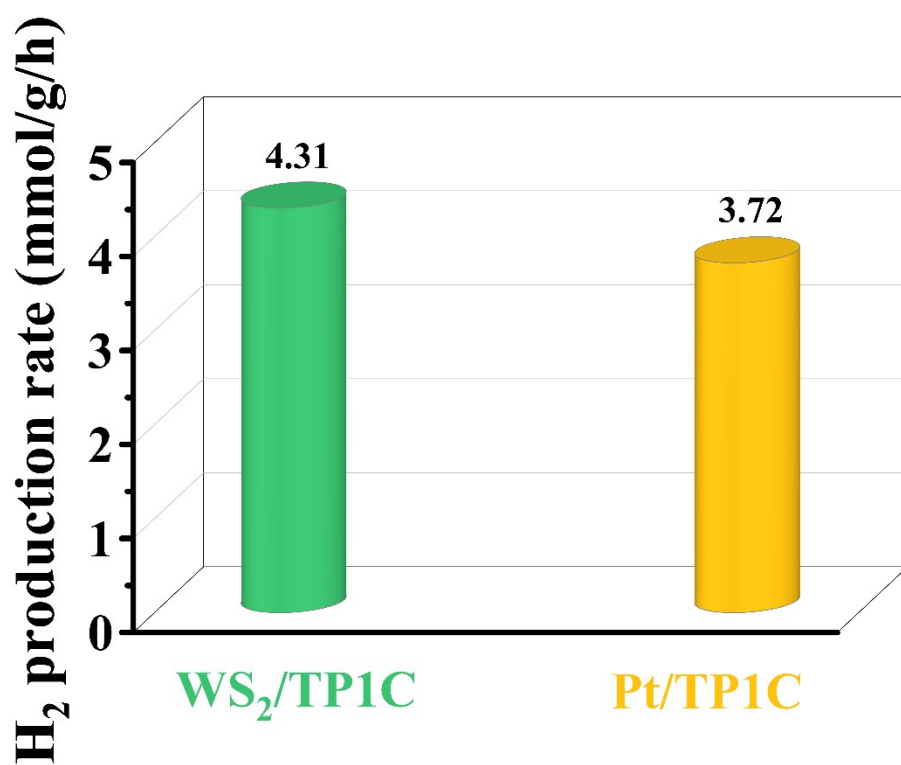

**Fig. S9.** Photocatalytic hydrogen evolution activity of WS<sub>2</sub>/TP1C and Pt/TP1C. As depicted in Fig. S9, WS<sub>2</sub>/TP1C exhibited higher photocatalytic hydrogen production rate as compared to Pt/TP1C, indicating superiority of two-dimensional co-catalysts.

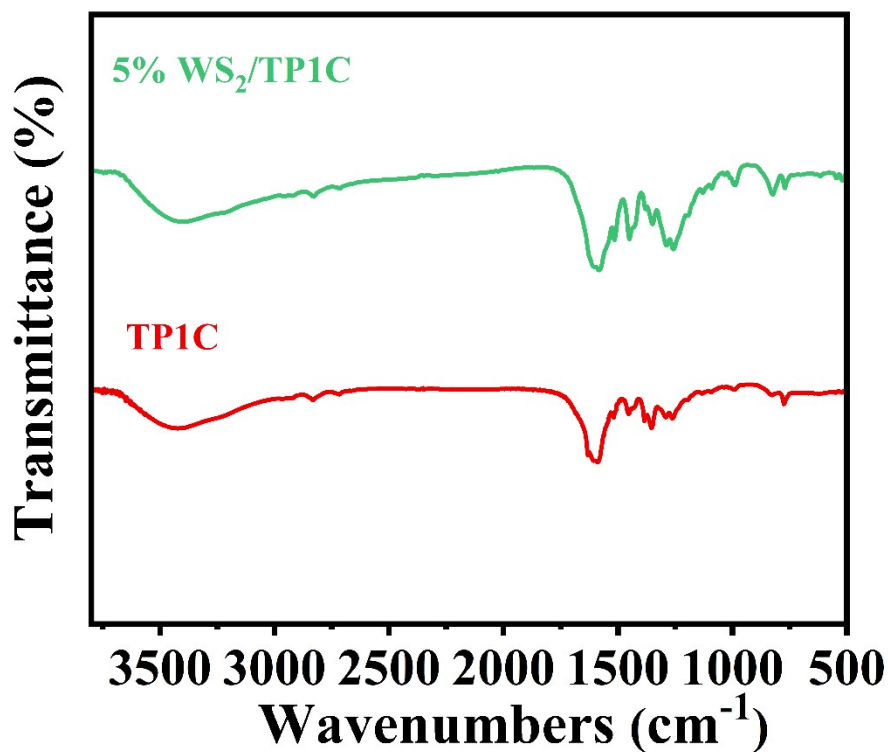

**Fig. S10.** Fourier-transform infrared (FT-IR) spectra of TP1C and 5% WS<sub>2</sub>/TP1C. As shown in Fig.S10, the broad spectral range between 3000 and 3700 cm<sup>-1</sup> can be ascribed to the stretching vibrations of -OH groups. The prominent peaks observed at approximately 1616 and 1451 cm<sup>-1</sup> corresponded to the stretching vibrations of C=O and C=C bonds, respectively. Furthermore, the band detected around 1255 cm<sup>-1</sup> was likely indicative of the stretching vibration of C-N bonds.<sup>4</sup>

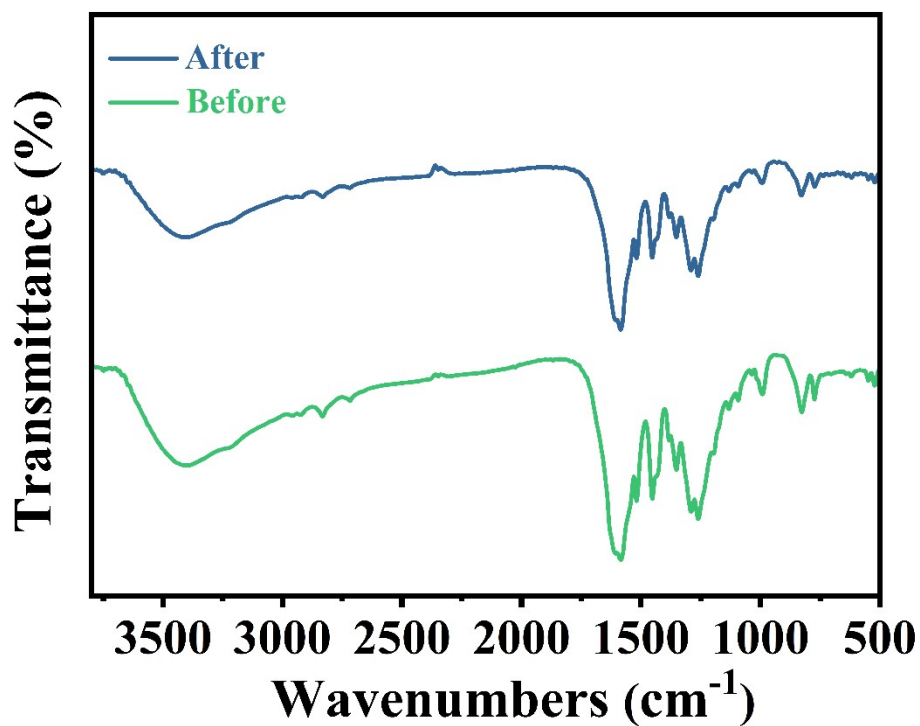

**Fig. S11.** Infrared spectra of 5% WS<sub>2</sub>/TP1C before and after the photocatalytic reaction.

As illustrated in Fig. S11, the Fourier-transform infrared (FT-IR) test was imposed on 5% WS<sub>2</sub>/TP1C after photocatalytic reaction, and the peak positions were almost consistent with those before the reaction, further proving that the prepared material possessed good durability.



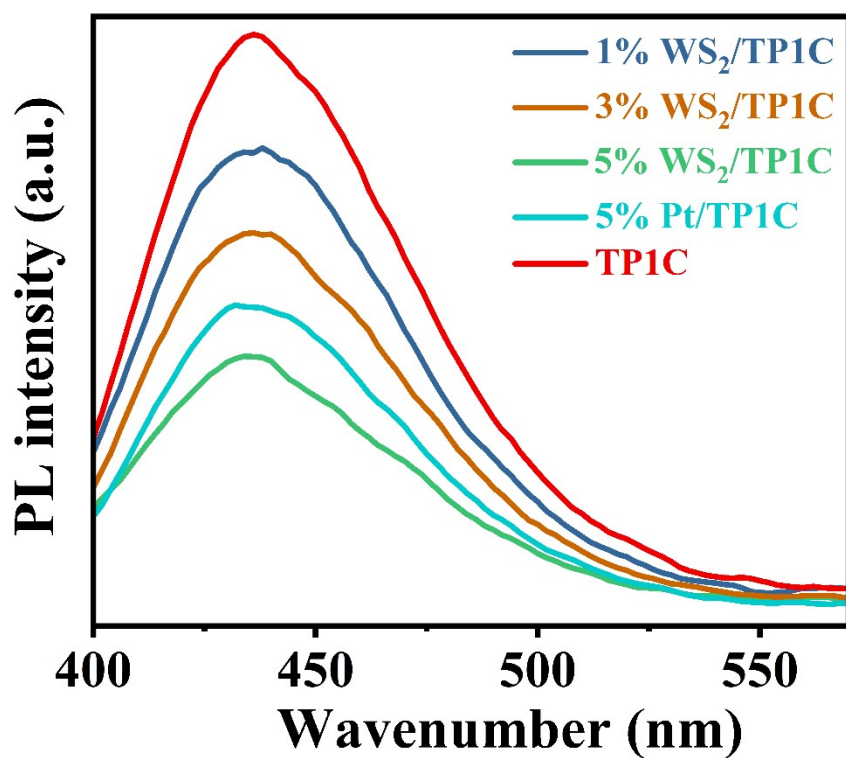

**Fig. S12.** The photoluminescence (PL) spectra of prepared samples. As displayed in Fig. S12, 5% WS<sub>2</sub>/TP1C exhibited lower fluorescence intensity as compared to bare COFs and 5% Pt/TP1C due to its higher charge separation efficiency.

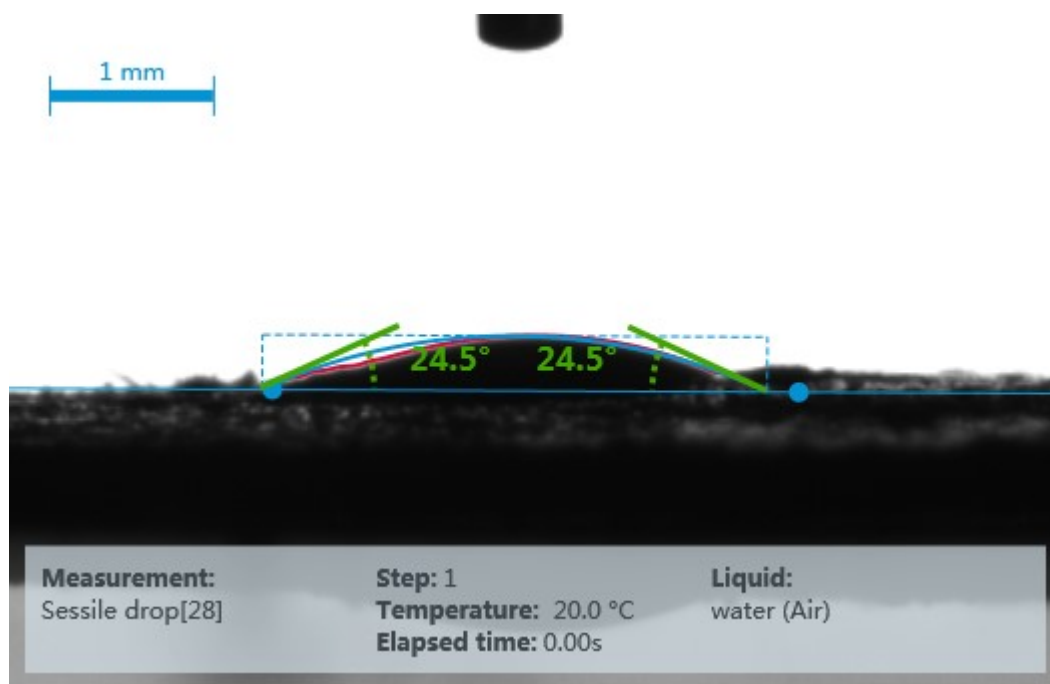

**Fig. S13.** The water contact angle of TP1C. As displayed in Fig. S13, the water contact angle measurements demonstrated a certain degree of hydrophilicity of pure TP1C.

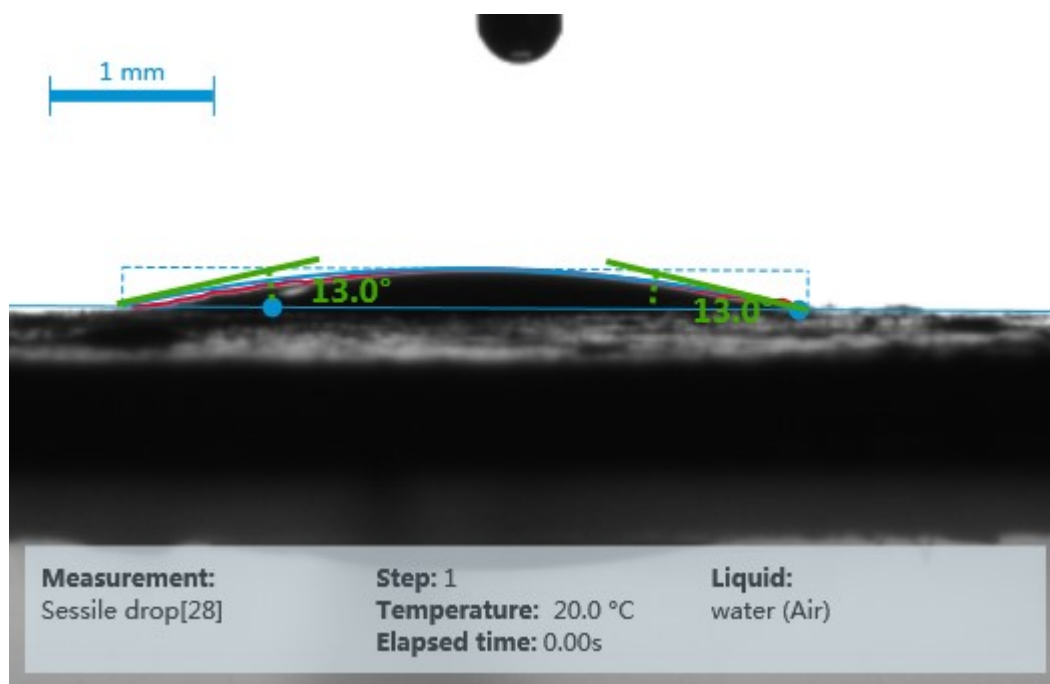

**Fig. S14.** The water contact angle of 5% WS<sub>2</sub>/TP1C. As depicted in Fig. S14, 5% WS<sub>2</sub>/TP1C owned the smaller water contact angle, proving its stronger hydrophilicity.

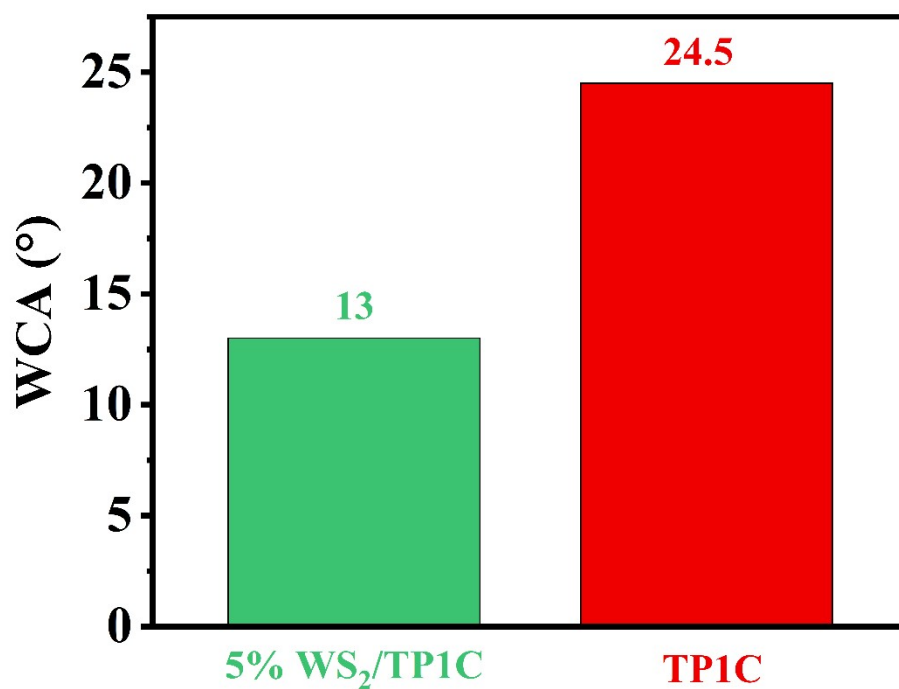

**Fig. S15.** The water contact angles of TP1C and 5% WS<sub>2</sub>/TP1C. It was evident that the WS<sub>2</sub>/TP1C hybrid sample with smaller WCA demonstrated notably higher hydrophilicity, indicating the potential for improved substrate enrichment and enhanced facilitation of photocatalytic activity for water splitting.

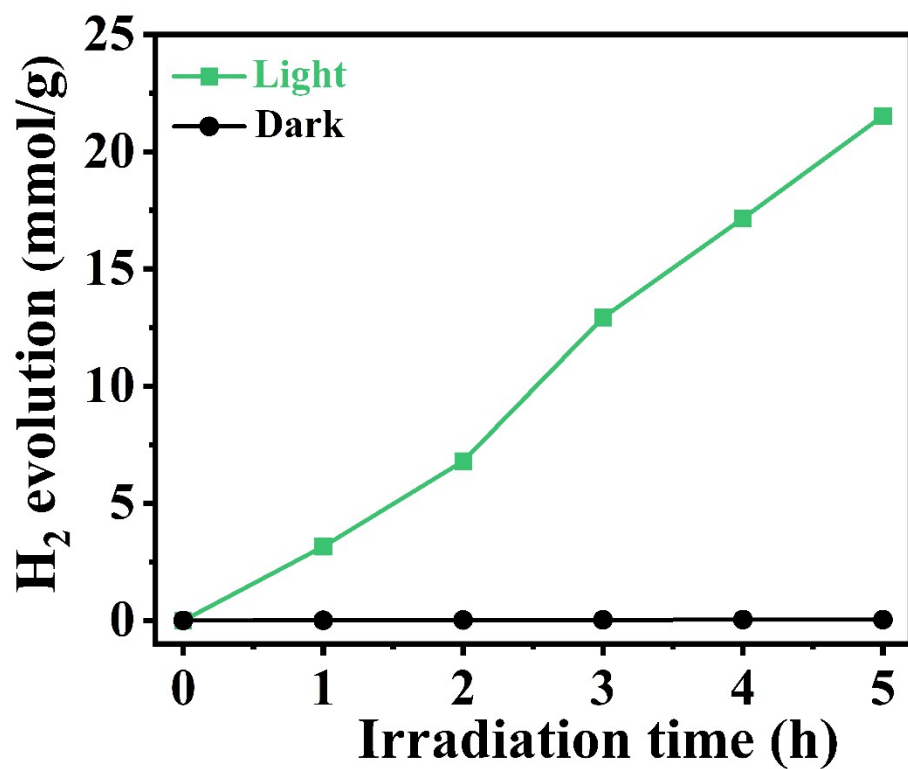

**Fig. S16.** The photocatalytic H<sub>2</sub> production rate of 5% WS<sub>2</sub>/TP1C under dark and light irradiation. As shown in Fig. S16, the 5% WS<sub>2</sub>/TP1C hybrid material exhibited no H<sub>2</sub> production under dark conditions.

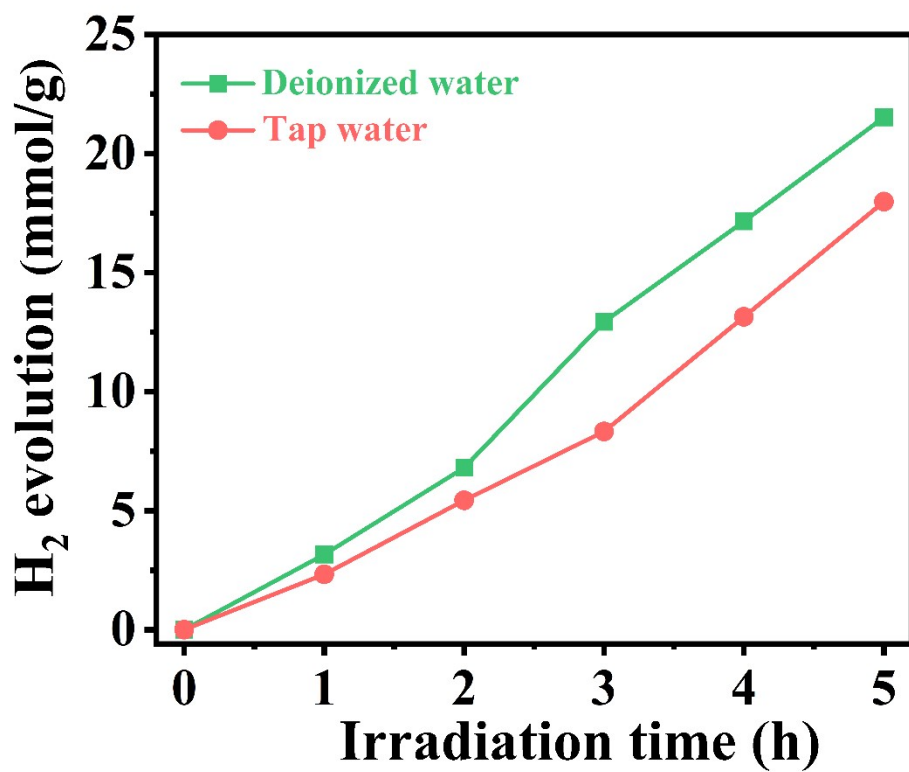

**Fig. S17.** Photocatalytic activity of 5% WS<sub>2</sub>/TP1C in different water matrices. As depicted in Fig. S17, due to the effect of impurity ions, the photocatalytic activity of 5% WS<sub>2</sub>/TP1C in tap water displayed a slight decreasing trend compared to that in deionized water, proving its potential for practical application.

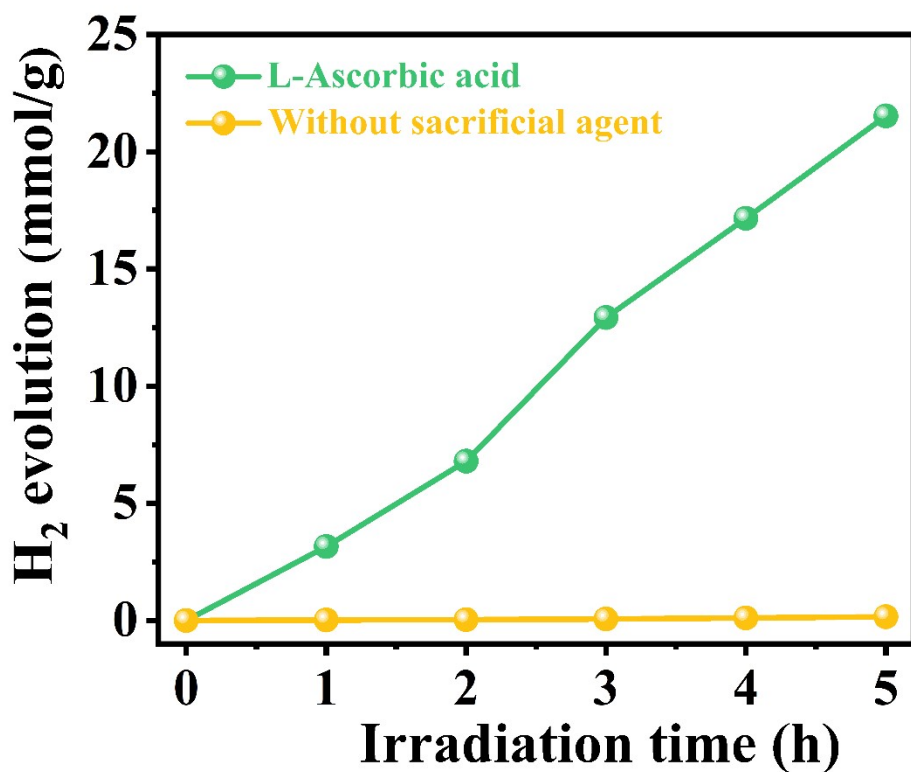

**Fig. S18.** The photocatalytic activity of 5% WS<sub>2</sub>/TP1C without sacrificial agent or with L-Ascorbic acid as sacrificial agent. Obviously, the 5% WS<sub>2</sub>/TP1C hybrid material exhibited negligible photocatalytic activity without any sacrificial agents due to severe electron-hole pair recombination issues (Fig. S18). Thus, L-Ascorbic acid, as a hole scavenger, plays a great role in enhancing the photocatalytic performance of WS<sub>2</sub>/TP1C composites.

**Table S1.** The lifetime of TP1C and 5% WS<sub>2</sub>/TP1C in time-resolved PL test

| Sample                   | $\tau_1$ (ns) | $B_1$    | $\tau_2$ (ns) | $B_2$   | $\tau_{av}$ (ns) |
|--------------------------|---------------|----------|---------------|---------|------------------|
| TP1C                     | 1.1112        | 760.0814 | 5.8154        | 50.6238 | 2.33             |
| 5% WS <sub>2</sub> /TP1C | 0.8288        | 772.2839 | 4.9470        | 92.8563 | 2.55             |



**Table S2.** Summary of previous reported photocatalysts with co-catalysis

| Sample                                      | Light                 | Sacrificial agent | Cocatalyst | H <sub>2</sub> evolution rate<br>( $\mu\text{mol}\cdot\text{g}^{-1}\cdot\text{h}^{-1}$ ) | Ref       |
|---------------------------------------------|-----------------------|-------------------|------------|------------------------------------------------------------------------------------------|-----------|
| 5% WS <sub>2</sub> /TP1C                    | $\lambda \geq 420$ nm | L-Ascorbic acid   | -          | 4305                                                                                     | This work |
| CdS-COF                                     | $\lambda \geq 420$ nm | Lactic acid       | Pt         | 3678                                                                                     | 5         |
| Tp-Pa-CN                                    | $\lambda \geq 420$ nm | Sodium ascorbate  | Pt         | 1800                                                                                     | 6         |
| N3-COF                                      | $\lambda \geq 420$ nm | TEOA              | Pt         | 1703                                                                                     | 7         |
| TZ-COF-4                                    | $\lambda \geq 420$ nm | L-Ascorbic acid   | Pt         | 4296                                                                                     | 8         |
| TFPT-COF                                    | $\lambda \geq 420$ nm | Sodium ascorbate  | Pt         | 1970                                                                                     | 9         |
| COF-BPDA                                    | $\lambda \geq 420$ nm | L-Ascorbic acid   | Pt         | 3230                                                                                     | 10        |
| TAB-TFP-COF                                 | $\lambda \geq 420$ nm | L-Ascorbic acid   | Pt         | 1140                                                                                     | 11        |
| 15N-CNU                                     | $\lambda \geq 420$ nm | TEOA              | Pt         | 2180                                                                                     | 12        |
| Co/Zn-Salen-COF                             | $\lambda \geq 420$ nm | L-Ascorbic acid   | -          | 1378                                                                                     | 13        |
| FL-CTF-2                                    | $\lambda \geq 420$ nm | TEOA              | Pt         | 1527                                                                                     | 14        |
| Cl-ECF                                      | $\lambda \geq 420$ nm | TEOA              | Pt         | 1296                                                                                     | 15        |
| CTF-N                                       | $\lambda \geq 420$ nm | TEOA              | Pt         | 538                                                                                      | 16        |
| Pt <sub>1</sub> @TpPa-1                     | $\lambda \geq 420$ nm | Sodium ascorbate  | -          | 719                                                                                      | 17        |
| Ni <sub>12</sub> P <sub>5</sub> /TpPa-1-COF | $\lambda \geq 420$ nm | L-Ascorbic acid   | -          | 3160                                                                                     | 18        |
| PyTA-BC-Ph                                  | $\lambda \geq 420$ nm | L-Ascorbic acid   | Pt         | 2763                                                                                     | 19        |
| TPCNNS-2                                    | $\lambda \geq 420$ nm | Sodium ascorbate  | Pt         | 1153                                                                                     | 20        |
| Ni(OH) <sub>2</sub> -2.5%/COF               | $\lambda \geq 420$ nm | Sodium ascorbate  | -          | 1895.99                                                                                  | 21        |
| ZnPor-DETH-COF                              | $\lambda > 400$ nm    | TEOA              | Pt         | 413                                                                                      | 22        |
| Py-1P-Ir                                    | 460 nm<br>LED light   | HCOONa            | -          | 1358                                                                                     | 23        |
| CuCo@C/g-C <sub>3</sub> N <sub>4</sub>      | $\lambda \geq 420$ nm | TEOA              | -          | 2120                                                                                     | 24        |

## References

- 1 Y. Lei, K. H. Ng, Y. Zhu, Y. Zhang, Z. Li, S. Xu, J. Huang, J. Hu, Z. Chen, W. Cai, Y. Lai, *Chem. Eng. J.*, 2023, **452**, 139325.
- 2 Z. Qian, R. Zhang, H. Hu, Y. Xiao, H. Li, X. Sun, T. Ma, *Solar RRL*, 2023, **7**, 2300547.
- 3 C. Zhang, C. Xie, Y. Gao, X. Tao, C. Ding, F. Fan, H.-L. Jiang, *Angew. Chem. Int. Ed.*, 2022, **61**, e202204108.
- 4 W. Weng, J. Guo, *Nat. Commun.*, 2022, **13**, 5768.
- 5 J. Thote, H. B. Aiyappa, A. Deshpande, D. Díaz Díaz, S. Kurungot, R. Banerjee, *Chem. Eur. J.*, 2014, **20**, 15961-15965.
- 6 L. Wang, L. Zhang, B. Lin, Y. Zheng, J. Chen, Y. Zheng, B. Gao, J. Long, Y. Chen, *Small*, 2021, **17**, 2101017.
- 7 V. S. Vyas, F. Haase, L. Stegbauer, G. Savasci, F. Podjaski, C. Ochsenfeld, B. V. Lotsch, *Nat. Commun.*, 2015, **6**, 8508.
- 8 K. Wang, Z. Jia, Y. Bai, X. Wang, S. E. Hodgkiss, L. Chen, S. Y. Chong, X. Wang, H. Yang, Y. Xu, F. Feng, J. W. Ward, A. I. Cooper, *J. Am. Chem. Soc.*, 2020, **142**, 11131-11138.
- 9 L. Stegbauer, K. Schwinghammer, B. V. Lotsch, *Chem. Sci.*, 2014, **5**, 2789-2793.
- 10 S. Bi, F. Meng, D. Wu, F. Zhang, *J. Am. Chem. Soc.*, 2022, **144**, 3653-3659.
- 11 X. Wu, M. Zhang, Y. Xia, C. Ru, P. Chen, H. Zhao, L. Zhou, C. Gong, J. Wu, X. Pan, *J. Mater. Chem. A*, 2022, **10**, 17691-17698.
- 12 J.-P. Zou, L.-C. Wang, J. Luo, Y.-C. Nie, Q.-J. Xing, X.-B. Luo, H.-M. Du, S.-L. Luo, S. L. Suib, *Appl. Catal. B: Environ.*, 2016, **193**, 103-109.
- 13 W. Zhou, Q.-W. Deng, H.-J. He, L. Yang, T.-Y. Liu, X. Wang, D.-Y. Zheng, Z.-B. Dai, L. Sun, C. Liu, H. Wu, Z. Li, W.-Q. Deng, *Angew. Chem. Int. Ed.*, 2023, **62**, e202214143.
- 14 L. Li, Y. Zhu, N. Gong, W. Zhang, W. Peng, Y. Li, F. Zhang, X. Fan, *Int. J. Hydrogen Energy*, 2020, **45**, 2689-2698.

- 15 S. Li, M.-F. Wu, T. Guo, L.-L. Zheng, D. Wang, Y. Mu, Q.-J. Xing, J.-P. Zou, *Appl. Catal. B: Environ.*, 2020, **272**, 118989.
- 16 L. Guo, Y. Niu, H. Xu, Q. Li, S. Razzaque, Q. Huang, S. Jin, B. Tan, *J. Mater. Chem. A*, 2018, **6**, 19775-19781.
- 17 P. Dong, Y. Wang, A. Zhang, T. Cheng, X. Xi, J. Zhang, *ACS Catal.*, 2021, **11**, 13266-13279.
- 18 K. Zhang, X. Sun, H. Hu, G. Yan, A. Qin, Y. Ma, H. Huang, T. Ma, *Small*, 2023, **19**, 2304674.
- 19 A. F. M. El-Mahdy, A. M. Elewa, S.-W. Huang, H.-H. Chou, S.-W. Kuo, *Adv. Opt. Mater.*, 2020, **8**, 2000641.
- 20 P. Dong, A. Zhang, T. Cheng, J. Pan, J. Song, L. Zhang, R. Guan, X. Xi, J. Zhang, *Chin. J. Catal.*, 2022, **43**, 2592-2605.
- 21 H. Dong, X.-B. Meng, X. Zhang, H.-L. Tang, J.-W. Liu, J.-H. Wang, J.-Z. Wei, F.-M. Zhang, L.-L. Bai, X.-J. Sun, *Chem. Eng. J.*, 2020, **379**, 122342.
- 22 R. Chen, Y. Wang, Y. Ma, A. Mal, X.-Y. Gao, L. Gao, L. Qiao, X.-B. Li, L.-Z. Wu, C. Wang, *Nat. Commun.*, 2021, **12**, 1354.
- 23 J. Hu, H. Mehrabi, Y.-S. Meng, M. Taylor, J.-H. Zhan, Q. Yan, M. Benamara, R. H. Coridan, H. Beyzavi, *Chem. Sci.*, 2021, **12**, 7930-7936.
- 24 S. Chen, Z. Yang, J. Chen, J. Liao, S. Yang, F. Peng, L.-X. Ding, G. Yang, S. Zhang, Y. Fang, *Chem. Eng. J.*, 2022, **434**, 134673.
